# Supplementary material
Source: PubMed Central journal article supplement (PMC9376579)
Supplement: 40429_2022_432_MOESM1_ESM.pdf [file 40429_2022_432_MOESM1_ESM.pdf]

## Supplementary Information

Search strategy: Ovid MEDLINE

|   |                                                                                                                                                                                                                                                                                                                                                                                                                                                                        |         |
|---|------------------------------------------------------------------------------------------------------------------------------------------------------------------------------------------------------------------------------------------------------------------------------------------------------------------------------------------------------------------------------------------------------------------------------------------------------------------------|---------|
| 1 | (Alcohol* or benzodiazepine* or Cannabis or Cocaine or Drug or Drugs or Ethanol or Heroin or Marijuana or methamphetamine* or Opioid* or opiate* or Substance).ti.                                                                                                                                                                                                                                                                                                     | 759531  |
| 2 | (Baclofen or Bupropion or Cannabinoid agonist* or Dronabinol or Gabapentin* or gamma-hydroxybutyric or GHB or g-hydroxybutyrate or Ketamine or Modafinil or Nabilone or Nabiximols or Oral delta-9-tetrahydrocannabinol or Oral THC or Pregabalin or Psychedelic* or Sodium oxybate or Stimulant or Stimulants or zolpidem or Armodafinil or Gabaergic or GABA B or GABAB or GABA-ergic or Lisdexamphetamine or Dextroamphetamine or Dexamfetamine or Desipramine).ti. | 40578   |
| 3 | ((randomized controlled trial or controlled clinical trial).pt. or controlled.tw. or randomized.tw. or placebo.tw. or randomly.tw. or trial.tw. or groups.tw. or drug therapy.fs.) not (exp animals/ not humans.sh.)                                                                                                                                                                                                                                                   | 4876857 |
| 4 | 1 and 2 and 3                                                                                                                                                                                                                                                                                                                                                                                                                                                          | 1480    |
| 5 | limit 4 to last 5 years                                                                                                                                                                                                                                                                                                                                                                                                                                                | 458     |
| 6 | limit 5 to english language                                                                                                                                                                                                                                                                                                                                                                                                                                            | 447     |
| 7 | limit 4 to last 15 years                                                                                                                                                                                                                                                                                                                                                                                                                                               | 1012    |
| 8 | limit 7 to english language                                                                                                                                                                                                                                                                                                                                                                                                                                            | 976     |
| 9 | 8 not 6                                                                                                                                                                                                                                                                                                                                                                                                                                                                | 529     |

Search strategy: Embase (Ovid)

|    |                                                                                                                                                                                                                                                                                                                                                                                                                                                                        |         |
|----|------------------------------------------------------------------------------------------------------------------------------------------------------------------------------------------------------------------------------------------------------------------------------------------------------------------------------------------------------------------------------------------------------------------------------------------------------------------------|---------|
| 1  | (Alcohol* or benzodiazepine* or Cannabis or Cocaine or Drug or Drugs or Ethanol or Heroin or Marijuana or methamphetamine* or Opioid* or opiate* or Substance).ti.                                                                                                                                                                                                                                                                                                     | 948754  |
| 2  | (Baclofen or Bupropion or Cannabinoid agonist* or Dronabinol or Gabapentin* or gamma-hydroxybutyric or GHB or g-hydroxybutyrate or Ketamine or Modafinil or Nabilone or Nabiximols or Oral delta-9-tetrahydrocannabinol or Oral THC or Pregabalin or Psychedelic* or Sodium oxybate or Stimulant or Stimulants or zolpidem or Armodafinil or Gabaergic or GABA B or GABAB or GABA-ergic or Lisdexamphetamine or Dextroamphetamine or Dexamfetamine or Desipramine).ti. | 50422   |
| 3  | exp clinical trial/ or crossover procedure/ or double-blind procedure/ or randomized controlled trial/ or single-blind procedure/ or (trial or groups or random* or factorial* or crossover* or (cross adj1 over*) or placebo* or (doubl* adj1 blind*) or (singl* adj1 blind*) or assign* or allocat* or volunteer*).tw.                                                                                                                                               | 5955173 |
| 4  | 1 and 2 and 3                                                                                                                                                                                                                                                                                                                                                                                                                                                          | 1550    |
| 5  | limit 4 to conference abstracts                                                                                                                                                                                                                                                                                                                                                                                                                                        | 369     |
| 6  | 4 not 5                                                                                                                                                                                                                                                                                                                                                                                                                                                                | 1181    |
| 7  | limit 6 to last 5 years                                                                                                                                                                                                                                                                                                                                                                                                                                                | 348     |
| 8  | limit 7 to english language                                                                                                                                                                                                                                                                                                                                                                                                                                            | 343     |
| 9  | limit 6 to last 15 years                                                                                                                                                                                                                                                                                                                                                                                                                                               | 803     |
| 10 | limit 9 to english language                                                                                                                                                                                                                                                                                                                                                                                                                                            | 773     |
| 11 | 10 not 8                                                                                                                                                                                                                                                                                                                                                                                                                                                               | 430     |

Search strategy: APA PsycInfo (Ovid)

|    |                                                                                                                                                                                                                                                                                                                                                                                                                                                                        |        |
|----|------------------------------------------------------------------------------------------------------------------------------------------------------------------------------------------------------------------------------------------------------------------------------------------------------------------------------------------------------------------------------------------------------------------------------------------------------------------------|--------|
| 1  | (Alcohol* or benzodiazepine* or Cannabis or Cocaine or Drug or Drugs or Ethanol or Heroin or Marijuana or methamphetamine* or Opioid* or opiate* or Substance).ti.                                                                                                                                                                                                                                                                                                     | 182727 |
| 2  | (Baclofen or Bupropion or Cannabinoid agonist* or Dronabinol or Gabapentin* or gamma-hydroxybutyric or GHB or g-hydroxybutyrate or Ketamine or Modafinil or Nabilone or Nabiximols or Oral delta-9-tetrahydrocannabinol or Oral THC or Pregabalin or Psychedelic* or Sodium oxybate or Stimulant or Stimulants or zolpidem or Armodafinil or Gabaergic or GABA B or GABAB or GABA-ergic or Lisdexamphetamine or Dextroamphetamine or Dexamfetamine or Desipramine).ti. | 12275  |
| 3  | exp clinical trials/ or treatment effectiveness evaluation/ or exp treatment outcomes/ or placebo/ or followup studies/ or (placebo* or random* or comparative stud* or (clinical adj3 trial*) or (research adj3 design) or (evaluat* adj3 stud*) or (prospectiv* adj3 stud*) or ((singl* or doubl* or trebl* or tripl*) adj3 (blind* or mask*)) or (randomi#ed adj7 trial*) or (controlled adj3 trial*)).tw,id.                                                       | 524094 |
| 4  | 1 and 2 and 3                                                                                                                                                                                                                                                                                                                                                                                                                                                          | 846    |
| 5  | limit 4 to ("0200 book" or "0240 authored book" or "0280 edited book" or "0300 encyclopedia" or "0400 dissertation abstract")                                                                                                                                                                                                                                                                                                                                          | 32     |
| 6  | 4 not 5                                                                                                                                                                                                                                                                                                                                                                                                                                                                | 814    |
| 7  | limit 6 to last 5 years                                                                                                                                                                                                                                                                                                                                                                                                                                                | 194    |
| 8  | limit 7 to english language                                                                                                                                                                                                                                                                                                                                                                                                                                            | 177    |
| 9  | limit 6 to last 15 years                                                                                                                                                                                                                                                                                                                                                                                                                                               | 534    |
| 10 | limit 9 to english language                                                                                                                                                                                                                                                                                                                                                                                                                                            | 506    |
| 11 | 10 not 8                                                                                                                                                                                                                                                                                                                                                                                                                                                               | 329    |
